# Supplementary material
Source: PubMed Central journal article supplement (PMC9717630)
Supplement: KID.0003142022-s0001.pdf [file KID.0003142022-s0001.pdf]

**Supplemental Material**  
**Monitoring in Dialysis Investigators and Committees.**

Nephrology Investigators—Don Williamson, MD (Southeastern Clinical Research Institute, Augusta, GA, Augusta, GA), Prabir Roy-Chaudhury, MD, (University of Arizona Health Sciences Center and Southern Arizona VA Health Care System, Tucson, AZ), James Tumlin, MD (Georgia Nephrology Clinical Research Institute, Atlanta, GA) Vijay Kher, MD (Medanta – The Medicity- Kidney & Urology Institute, Gurgaon, India), Vikranth Reddy, MD (CARE Hospital Hyderabad, India), Kowdle Chandrasekhar Prakash, MD, (Apollo Hospitals –Chennai, India), David Charytan, MD MSc (Brigham & Women’s Hospital, Boston, MA), Suresh Chandra Tiwari, MD (Fortis Vasant Kunj Hospital Delhi, India), Saurabh Pokhariyal, MD (Fortis Memorial Research Institute Gurgaon, India), Amber Podoll, MD (University of Texas-Houston, Houston, TX), Sanjeev Jasuja, MD (Apollo Hospitals – Delhi, Delhi, India).

Cardiology Investigators—G. Leslie Walters, MD (Augusta Cardiology Clinic, Augusta, GA), Kraig Wangsnes, MD (Cardiovascular Associates, Augusta, GA), Alexandru Costea, MD (University of Cincinnati Medical Center, Cincinnati, OH), Selcuk Tombul, MD (Diagnostic Cardiology Group, Chattanooga, TN), Balbir Singh, MD (Medanta – The Medicity- Heart Institute, Gurgaon, India), Brajesh Mishra, MD (Medanta – The Medicity- Heart Institute, Gurgaon, India), Sachin Yalagudri, MD (CARE Hospital, Hyderabad, India), Abhijeet Shelke, MD (CARE Hospital Hyderabad, India), Calambur Narasimhan, MD (CARE Hospital, Hyderabad, India), A.M. Karthigesan, MD (Apollo Hospitals – Chennai, Chennai, India), Abraham Oomman, MD (Apollo Hospitals – Chennai, Chennai, India), K P Pramod Kumar, MD (Apollo Hospitals – Chennai, Chennai, India), Bruce Koplan, MD (Brigham & Women’s Hospital, Boston, MA),

Upendra Kaul, MD (Fortis Vasant Kunj Hospital, Delhi, India), Tapan Ghose, MD (Fortis Vasant Kunj Hospital, Delhi, India), Ripen Gupta, MD (Fortis Vasant Kunj Hospital, Delhi, India), Arvind Sethi, MD (Fortis Escorts Hospital, Delhi, India), Nikhil Kumar, MD (Fortis Memorial Research Institute, Gurgaon, India), Ramesh Hariharan, MD, (University of Texas-Houston, Houston, TX), Rajnish Sardana, MD (Apollo Hospitals – Delhi, Delhi, India), Arif Wahab, MD (Apollo Hospitals – Delhi, Delhi, India) N.N Khanna, MD (Apollo Hospitals – Delhi, Delhi, India)

Nephrology Co-investigators— Mark Smith, MD (Southeastern Clinical Research Institute, Augusta, GA), Suresh Kamath, MD (University of Cincinnati Medical Center, Cincinnati, OH), Claude Galphin, MD (South East Renal Research Institution (SERRI), Chattanooga, TN), Puneet Sodhi, MD (Medanta – The Medicity- Heart Institute, Gurgaon, India), Rajsekara Chakravarthy, MD (CARE Hospital, Hyderabad, India), Subba Rao Budithi, MD (Apollo Hospitals – Chennai, Chennai, India), Finnian McCausland, MB, MSc (Brigham & Women’s Hospital, Boston, MA), Sanjeev Gulati, MD (Fortis Vasant Kunj Hospital, Delhi, India), Munawer Dijoo, MD (Fortis Vasant Kunj Hospital, Delhi, India), Upendra Singh, MD (Fortis Escorts Hospital, Delhi, India), Salil Jain, MD (Fortis Memorial Research Institute, Gurgaon, India), Vishal Saxena, MD (Fortis Memorial Research Institute, Gurgaon, India), Gaurav Sagar, MD (Apollo Hospitals – Delhi Delhi, India)

Advisory Committee—David Charytan, MD, MSc, (Brigham & Women’s Hospital, Boston, MA), Rachel Fissell, MD (Vanderbilt University, Nashville, TN), Robert Foley, MD (Hennepin County Medical Center, Minneapolis, MN), Charles A. Herzog, MD

(Hennepin County Medical Center, University of Minnesota, Minneapolis, MN), Peter A. McCullough, MD (Baylor University Medical Center, Baylor Heart and Vascular Institute, Baylor Jack and Jane Hamilton Heart and Vascular Hospital, Dallas), John D. Rogers, MD (Scripps Clinic-Torrey Pines, La Jolla, CA), James A. Tumlin, MD (South East Renal Research Institution (SERRI), Chattanooga, TN), Peter Zimetbaum, MD (Beth Israel Deaconess Medical Center, Boston, MA)

Adverse Events Committee— Manish Assar, MD (Baylor University Medical Center, Dallas, TX), Mark Kremers, MD (Mid Carolina Cardiology Charlotte, North Carolina), Wolfgang C. Winkelmayr, MD, ScD (Baylor College of Medicine, Houston, TX)
